# Supplementary material for: Hydrolysis of ionic clusters to induce interconnective sieving pores in ion-conductive membranes for vanadium flow batteries
Source: Royal Society of Chemistry journal article supplement (doi:10.1039/d2ta05778f), 2022-01-01
Supplement: d2ta05778f1.pdf [file d2ta05778f1.pdf]

## Hydrolysis of ionic clusters to induce interconnective sieving pores in ion-conductive membranes for vanadium flow batteries

Bo Pang<sup>1</sup>, Zihao Fan<sup>1</sup>, Wanting Chen<sup>1</sup>, Xiaoming Yan<sup>1</sup>, Ruohan Du<sup>1</sup>, Xiaozhou Wang<sup>1</sup>, Xuemei

Wu<sup>1\*</sup>, Fujun Cui<sup>2</sup>, Minggang Guo<sup>2</sup>, Gaohong He<sup>1,2\*</sup>

1 State Key Laboratory of Fine Chemicals, Research and Development Center of Membrane Science and Technology, School of Chemical Engineering, Dalian University of Technology, Dalian, 116024, China.

2 Panjin Institute of Industrial Technology, Liaoning Key Laboratory of Chemical Additive Synthesis and Separation, Dalian University of Technology, Panjin 124221, Liaoning, China

\*Xuemei Wu: xuemeiw@dlut.edu.cn, hgaohong@dlut.edu.cn

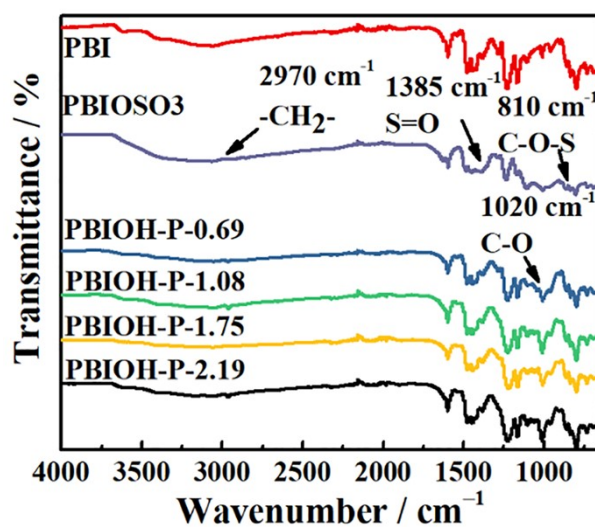

Fig. S1. The FTIR patterns of PBI, PBIOSO3 and PBIOSH-P membranes.

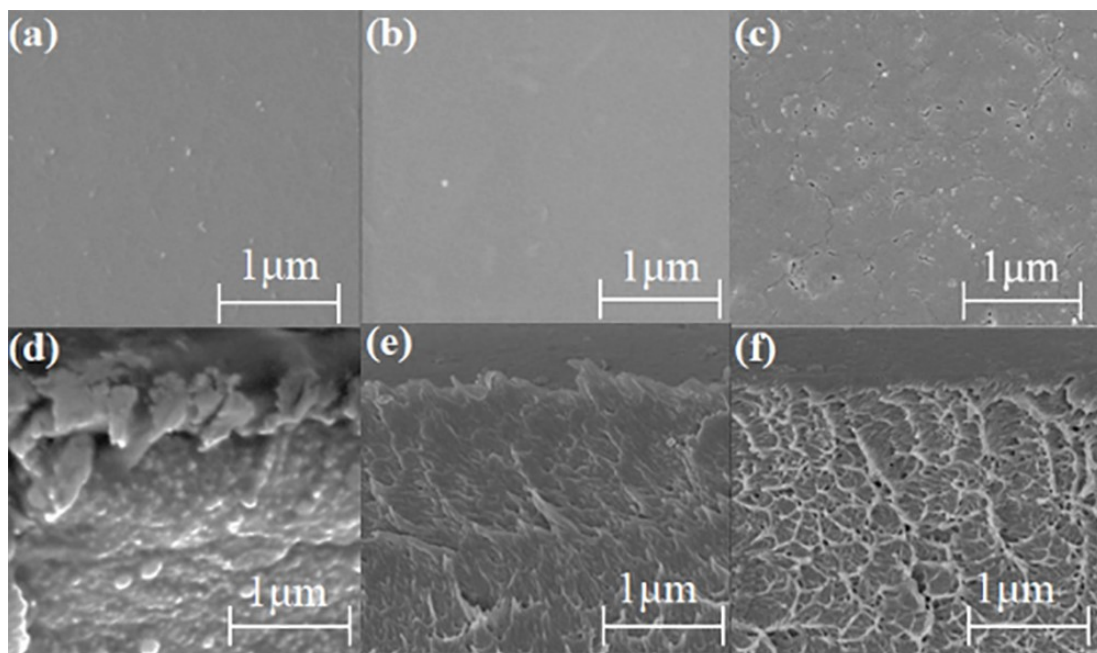

**Fig. S2.** The SEM surface images of (a) PBI, (b) PBIOSO3 and (c) PBIOH-P-1.75 membranes; cross-section images of (d) PBI, (e) PBIOSO3 and (f) PBIOH-P-1.75 membranes.

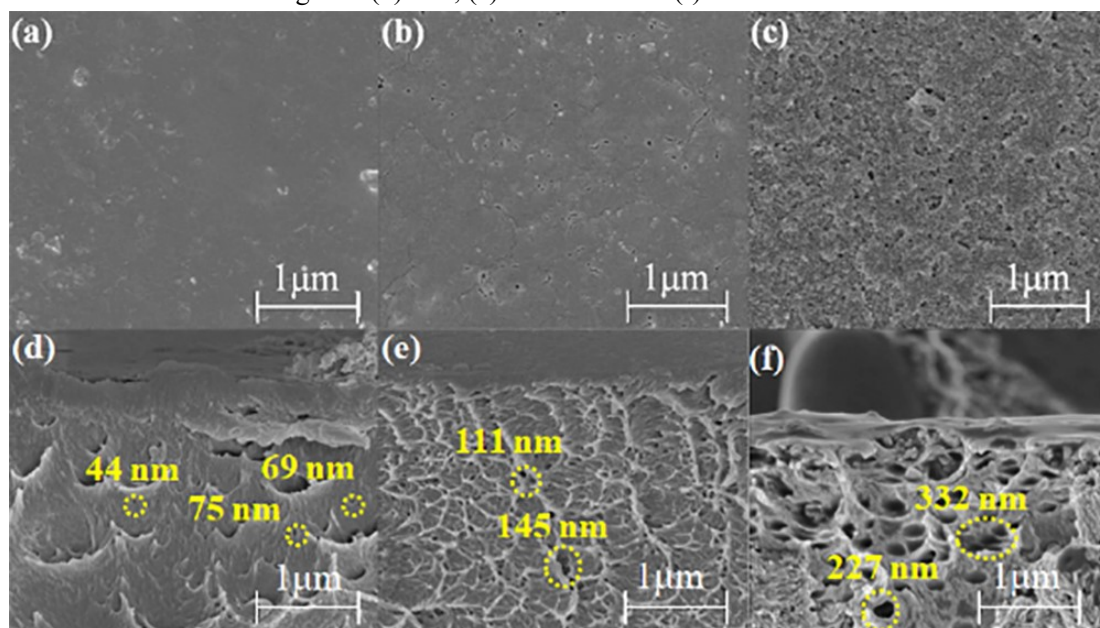

**Fig. S3.** The SEM surface images of (a) PBIOH-P-0.69, (b) PBIOH-P-1.75 and (c) PBIOH-P-2.19 membranes; cross-section images of (d) PBIOH-P-0.69, (e) PBIOH-P-1.75 and (f) PBIOH-P-2.19 membranes

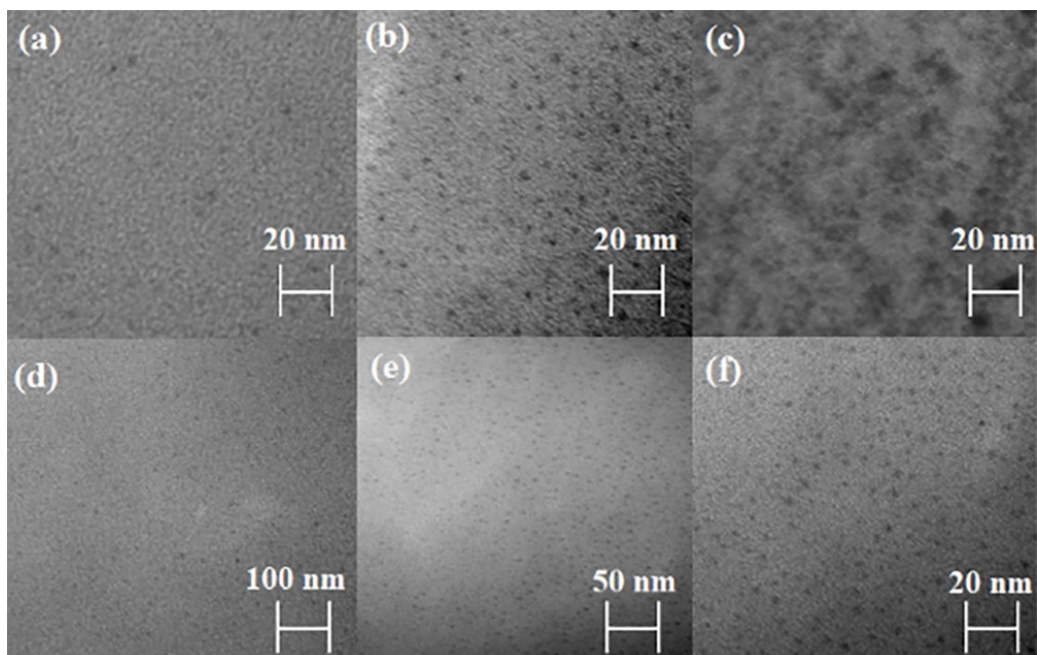

**Fig. S4.** The TEM ions clusters images of (a) OPBIO3-0.69, (b) OPBIO3-1.75 and (c) OPBIO3-2.19 membranes; TEM ions clusters images of OPBIO3-1.75 membrane with 100 nm, 50 nm and 20 nm.

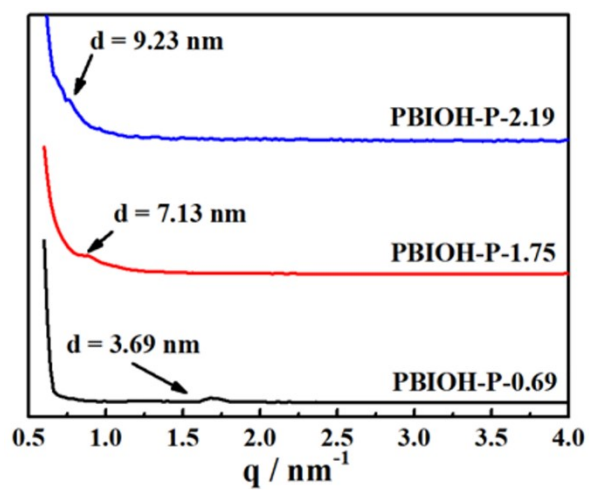

**Fig. S5.** SAXS curves of the PBIOH-P membranes.

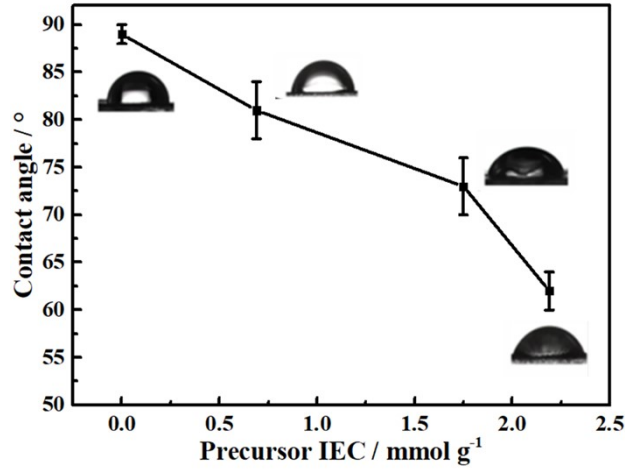

Fig. S6. The contact angle of the PBI and PBIOH-P membranes.

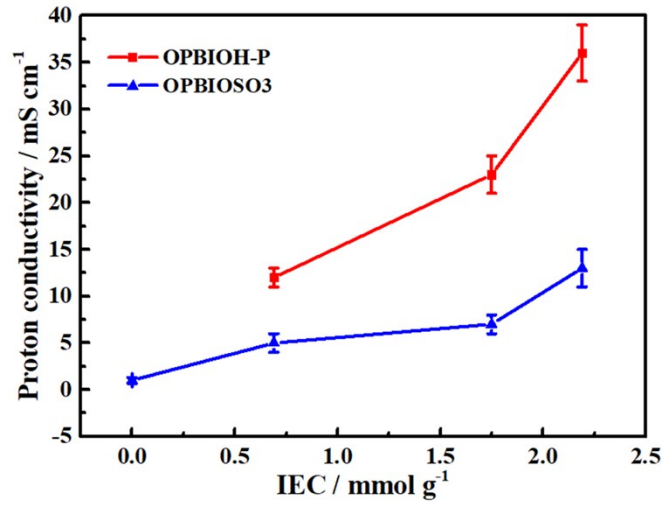

Fig. S7. The proton conductivity of the PBIOH-P and PBIO3 membranes.

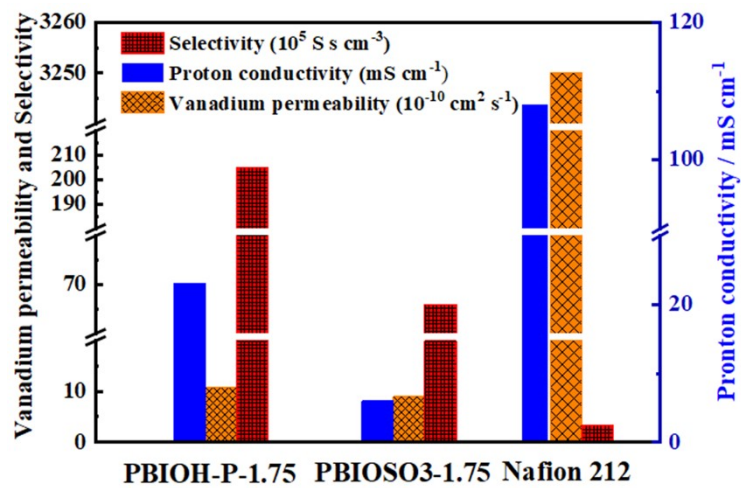

Fig. S8. The Selectivity, proton conductivity and vanadium permeability of the PBIOH-P, PBIO3-1.75 and Nafion 212 membranes. (Selectivity is denoted as proton conductivity divided by vanadium permeability)

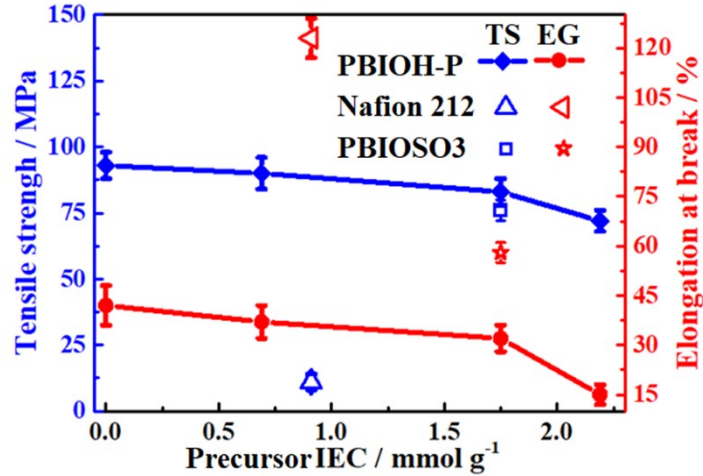

Fig. S9. Tensile strength and elongation at break of the PBIOH-P and PBIOSO3 membranes with precursor IEC of 1.75, and Nafion 212 membrane.

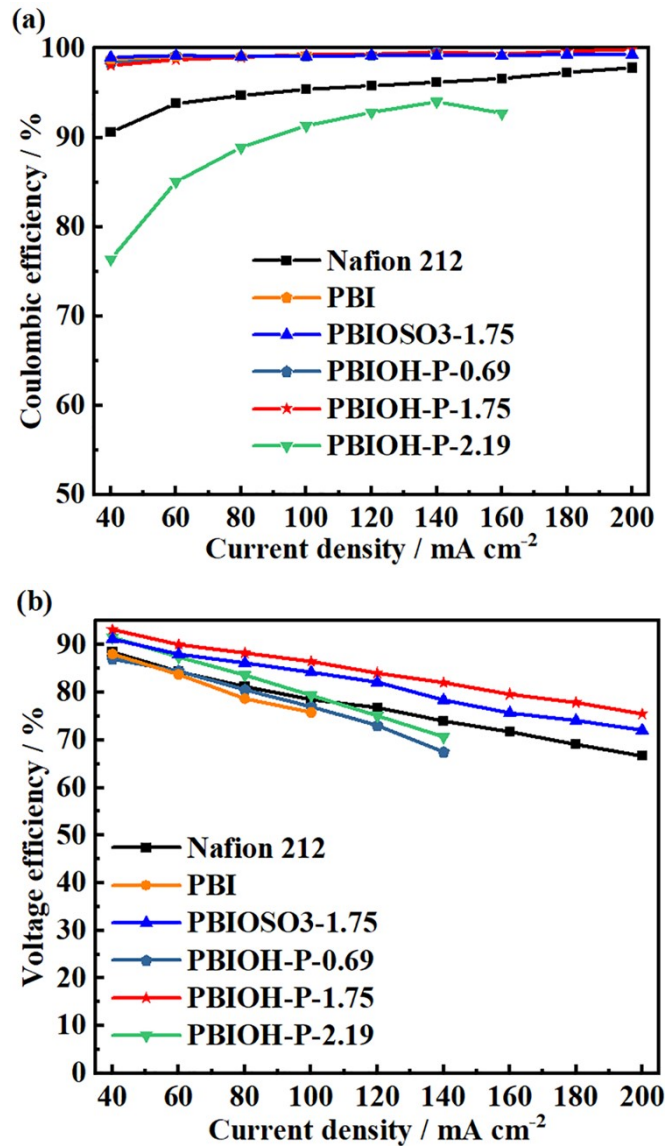

Fig. S10. Coulombic efficiency and voltage efficiency of the PBIOH-P, Nafion 212, PBI and PBIOSO3-1.75 based cells.

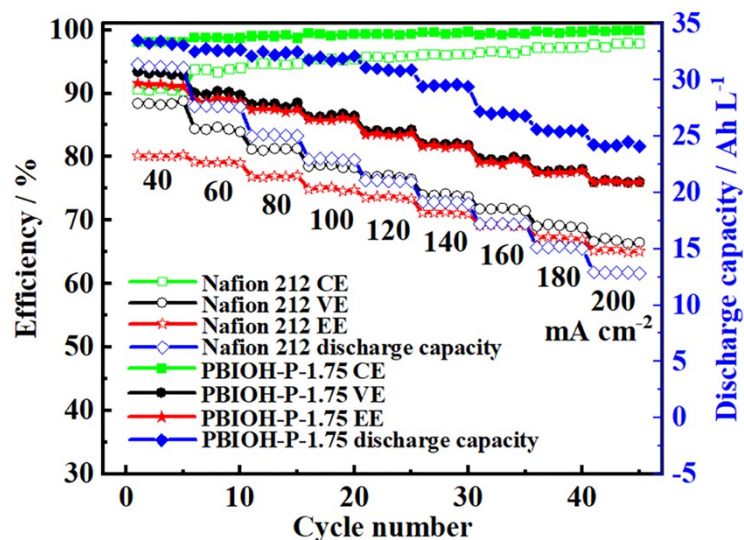

**Fig. S11.** The rate performance of the PBI0H-P-1.75 and Nafion 212 based VFBS.

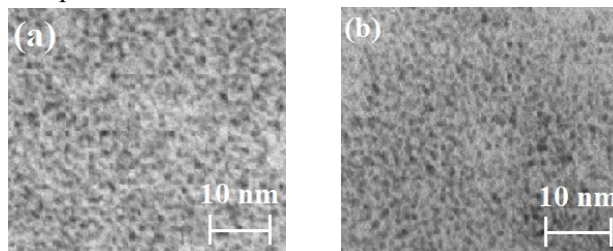

**Fig. S12.** The TEM images of pore morphology (a) before and (b) after VFB cycling test

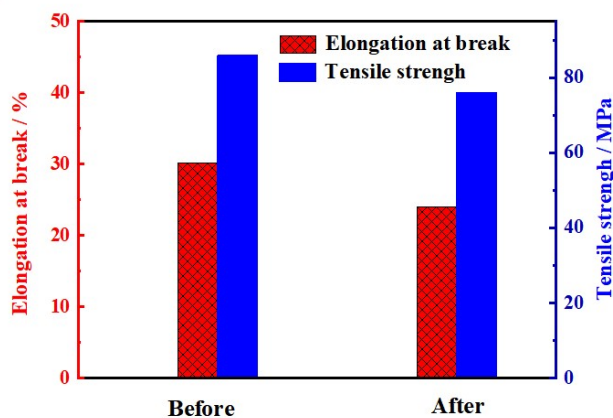

**Fig. S13.** The mechanical properties before and after VFB cycling test

*Table S1* The comparison of  $H^+/V^{n+}$  ion selectivity with recently reported porous membranes, composite membranes, and anion exchange membranes

| Membranes | Category | $H^+/V^{n+}$ Selectivity | Conductivity | Reference |
|-----------|----------|--------------------------|--------------|-----------|
|-----------|----------|--------------------------|--------------|-----------|

|                                                |                                | $\times 10^5 S \text{ min cm}^{-3}$ | $mS \text{ cm}^{-1}$ |    |
|------------------------------------------------|--------------------------------|-------------------------------------|----------------------|----|
| <i>This work</i>                               | <i>Porous membranes</i>        | 3.42                                | 70                   |    |
| <i>SPEEK/SPAES-15</i>                          | <i>Composite membrane</i>      | 0.29                                | 29.3                 | 1  |
| <i>SPI/2% PMPP</i>                             | <i>Composite membrane</i>      | 1.42                                | 116                  | 2  |
| <i>SPEEK/Hi m-pS-3</i>                         | <i>Composite membrane</i>      | 0.40                                | 31.54                | 3  |
| <i>S/801&amp;808-4</i>                         | <i>Composite membrane</i>      | 2.2                                 | 78                   | 4  |
| <i>SPEEK/SP PTA-25</i>                         | <i>Composite membrane</i>      | 0.23                                | 29.08                | 5  |
| <i>QCPPAE</i>                                  | <i>Anion exchange membrane</i> | 0.96                                | 21                   | 6  |
| <i>CAPSU</i>                                   | <i>Anion exchange membrane</i> | 2.08                                | 15                   | 7  |
| <i>PyPPSU</i>                                  | <i>Anion exchange membrane</i> | 2.44                                | 8.8                  | 8  |
| <i>PVDF/SiO<sub>2</sub>-SO<sub>3</sub>H-42</i> | <i>Porous membranes</i>        | 1.25                                | 14                   | 9  |
| <i>2# ABPBI</i>                                | <i>Porous</i>                  | 0.79                                | 30                   | 10 |

Reference:

1. P. Qian, H. Wang, L. Zhang, Y. Zhou, H. Shi, An enhanced stability and efficiency of SPEEK-based composite membrane influenced by amphoteric side-chain polymer for vanadium redox flow battery, *J. Membr. Sci.* 2022, **643**, 120011.
2. M. Zhang, G. Wang, A. Li, X. Wei, F. Li, J. Zhang, J. Chen, R. Wang, Novel sulfonated polyimide membrane blended with flexible poly[bis (4-methylphenoxy) phosphazene] chains for all vanadium redox flow battery, *J. Membr. Sci.* 2021, **619**, 118800.
3. D. Zhang, Z. Xu, X. Zhang, L. Zhao, Y. Zhao, S. Wang, W. Liu, X. Che, J. Yang, J. Liu, C. Yan, Oriented Proton-Conductive Nanochannels Boosting a Highly Conductive Proton-Exchange Membrane for a Vanadium Redox Flow Battery, *ACS Appl. Mater. Interfaces.* 2021, **13**, 4051-4061.
4. L. Xin, D. Zhang, K. Qu, Y. Lu, Y. Wang, K. Huang, Z. Wang, W. Jin, Z. Xu, Zr-MOF-Enabled Controllable Ion Sieving and Proton Conductivity in Flow Battery Membrane, *Adv. Funct. Mater.* 2021, **31**, 2104629.
5. P. Qian, H. Wang, Y. Jiang, Y. Zhou, H. Shi, High-performance composite membrane based on synergistic main-chain/side-chain proton conduction channels for the vanadium redox flow battery, *J. Mater. Chem. A*, 2021, **9**, 4240-4252.
6. M. Cha, J. Lee, T. Kim, H. Jeong, H. Shin, S. Oh, Y. Hong, Preparation and characterization of crosslinked anion exchange membrane (AEM) materials with poly(phenylene ether)-based short hydrophilic block for use in electrochemical applications, *J Membr Sci.* 2017, **530**, 73–83.
7. M. Cha, H. Jeong, H. Shin, S. Hong, T. Kim, S. Oh, J. Lee, Y. Hong, Crosslinked anion exchange membranes with primary diamine-based crosslinkers for vanadium redox flow battery application, *J Power Sources* 2017, **363**, 78–86.
8. B. Zhang, E. Zhang, G. Wang, P. Yu, Q. Zhao, F. Yao, Poly(phenyl sulfone) anion exchange membranes with pyridinium groups for vanadium redox flow battery applications, *J Power Sources*, 2015, **282**, 328–334.
9. L. Ling, M. Xiao, D. Han, S. Ren, S. Wang, Y. Meng, Porous composite membrane of PVDF/Sulfonic silica with high ion selectivity for vanadium redox flow battery, *J. Membr. Sci.* 2019, **585**, 230-237.
10. T. Luo, B. Dreusicke, M. Wessling, Tuning the ion selectivity of porous poly(2,5-benzimidazole) membranes by phase separation for all vanadium redox flow batteries, *J. Membr. Sci.* 2018, **556**, 164-177.
